# Supplementary material for: Acupuncture points can be identified as cutaneous neurogenic inflammatory spots
Source: PubMed Central journal article supplement (PMC5680247; doi:10.1038/s41598-017-14359-z), 2017-11-09
Supplement: 41598_2017_14359_MOESM1_ESM.pdf [file 41598_2017_14359_MOESM1_ESM.pdf]

## <Supplementary Materials>

Acupuncture points can be identified as cutaneous neurogenic inflammatory spots

**Authors:** Do-Hee Kim, Yeonhee Ryu, Dae Hyun Hahm, Boo Yong Sohn, Insop Shim, O Sang Kwon, Suchan Chang, Young Seob Gwak, Min Sun Kim, Jae Hyo Kim, Bong Hyo Lee, Eun Young Jang, Rongjie Zhao, Jin Mo Chung, Chae Ha Yang, Hee Young Kim

**Supplementary Table S1.** Number of neurogenic spots corresponding to known acupoints in the hypertension and colitis models. FL=forelimb, HL=hind limb

| Model         | Hypertension         |                                  | Colitis              |                                  |
|---------------|----------------------|----------------------------------|----------------------|----------------------------------|
|               | Location of Neuro-Sp | Number of Neuro-Sp (n = 18 rats) | Location of Neuro-Sp | Number of Neuro-Sp (n = 13 rats) |
| Acupoints     | PC6 (FL)             | 28                               | SP4 (HL)             | 12                               |
|               | PC7 (FL)             | 24                               | ST44 (HL)            | 7                                |
|               | HT7 (FL)             | 22                               | BL66 (HL)            | 4                                |
|               | SI3 (FL)             | 5                                | BL25 (HL)            | 3                                |
|               | PC4 (FL)             | 4                                | BL29 (HL)            | 1                                |
|               | LU9 (FL)             | 2                                | BL64 (HL)            | 2                                |
|               | LR3 (HL)             | 2                                | BL65 (HL)            | 1                                |
|               | BL54 (HL)            | 1                                | GB32 (HL)            | 1                                |
|               |                      |                                  | GV1                  | 2                                |
|               |                      |                                  | KD14 (HL)            | 1                                |
|               |                      |                                  | ST25 (HL)            | 3                                |
|               |                      |                                  | ST27 (HL)            | 1                                |
|               |                      |                                  | ST31 (HL)            | 1                                |
|               |                      |                                  | ST35 (HL)            | 1                                |
|               |                      |                                  | ST36 (HL)            | 3                                |
|               |                      |                                  | ST42 (HL)            | 1                                |
|               |                      |                                  | ST43 (HL)            | 1                                |
|               |                      |                                  | ST44 (HL)            | 1                                |
|               |                      | <b>Subtotal</b>                  | <b>88</b>            | <b>Subtotal</b>                  |
| Non-Acupoints | fore-digits (FL)     | 5                                | abdomen              | 3                                |
|               | left heel (HL)       | 16                               | scrotum              | 2                                |
|               | right heel (HL)      | 15                               | tail                 | 2                                |
|               | hindpaw pad (HL)     | 7                                | tail base            | 3                                |
|               |                      |                                  | left heel (HL)       | 2                                |
|               |                      |                                  | right heel (HL)      | 3                                |
|               |                      | <b>Subtotal</b>                  | <b>43</b>            | <b>Subtotal</b>                  |
| <b>Total</b>  |                      | <b>131</b>                       |                      | <b>61</b>                        |
